# Supplementary material for: Anti-Inflammatory Activity of a Polymeric Proanthocyanidin from Serjania schiedeana
Source: PubMed Central journal article supplement (PMC6152783; doi:10.3390/molecules22060863), 2017-05-26
Supplement: molecules-22-00863-s001.pdf [file molecules-22-00863-s001.pdf]

## Anti-inflammatory activity of a polymeric proanthocyanidin from *Serjania schiedeana*

David Osvaldo Salinas-Sánchez<sup>1,2</sup>, Enrique Jiménez-Ferrer<sup>1</sup>, Verónica Sánchez-Sánchez<sup>1,3</sup>, Alejandro Zamilpa<sup>1</sup>, Manasés González-Cortázar<sup>1</sup>, Tortoriello J<sup>1</sup> and Maribel Herrera-Ruiz<sup>1,\*</sup>

<sup>1</sup> Biomedical Research Center of the South (IMSS), Argentina 1, Col. Centro, Xochitepec 62790, Morelos, Mexico; E-Mails: enriqueferrer\_mx@yahoo.com (E.J.-F.); azamilpa\_2000@yahoo.com.mx (A.Z.); gmanases@hotmail.com (M.G.-C.)

<sup>2</sup> Biodiversity and Conservation Research Center. (UAEM), Av. Universidad 1001, Col. Chamilpa, Cuernavaca 62209, Morelos, Mexico; E-Mail: davidos@uaem.mx (D.O.S.-S.)

<sup>3</sup> Faculty of Biological Sciences (FBC), UAEM, Av. Universidad 1001, Col. Chamilpa, 62209 Cuernavaca, Morelos, Mexico; E-mail: vEra1o@outlook.es (V.S.S)

\* Correspondence: cibus\_herj@yahoo.com.mx; Tel.: +52-777-361-215-5

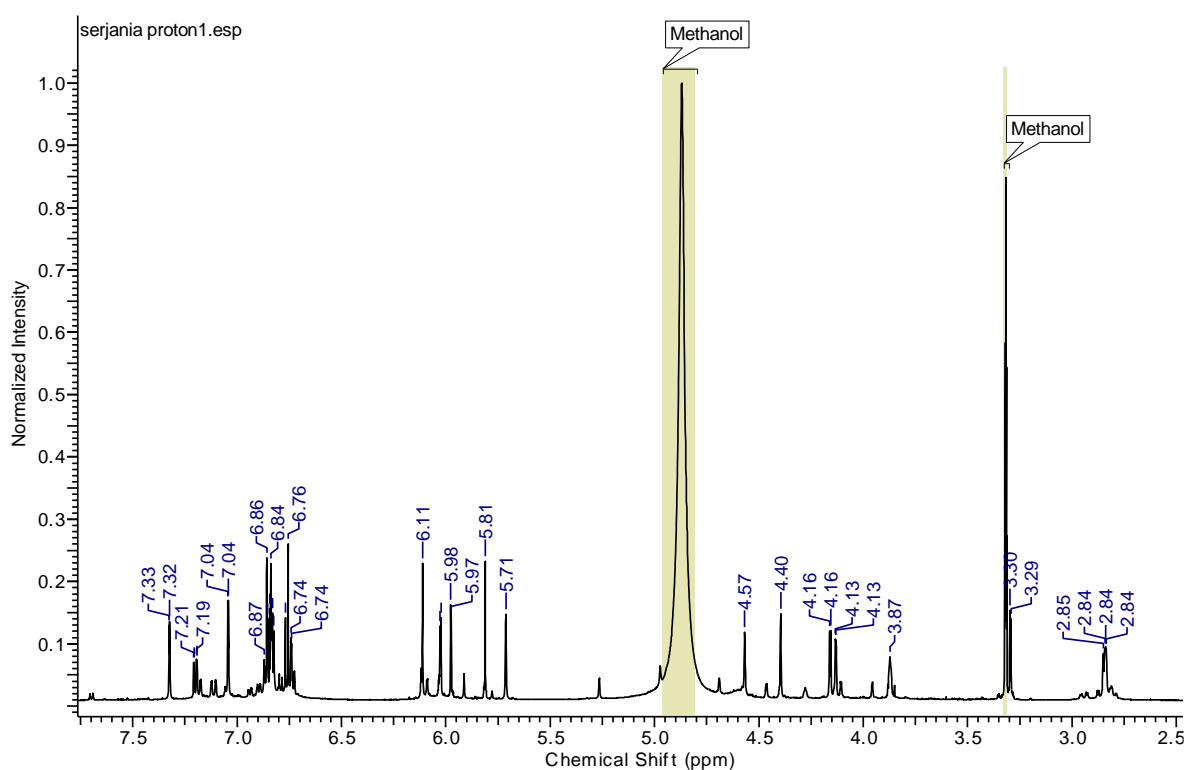

Fig. 1S <sup>1</sup>H NMR (CD<sub>3</sub>OD, 400 MHz) Compound ETP.

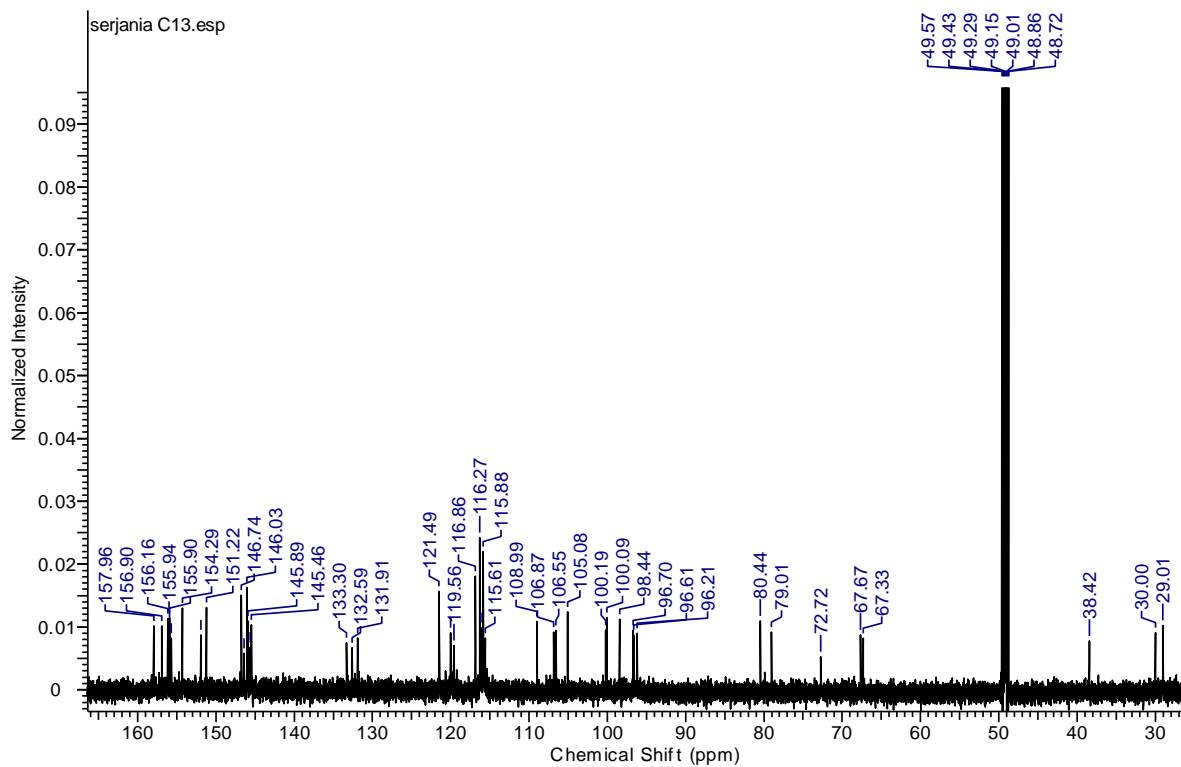

Fig. 2S  $^{13}\text{C}$  NMR ( $\text{CD}_3\text{OD}$ , 100 MHz) Compound ETP.

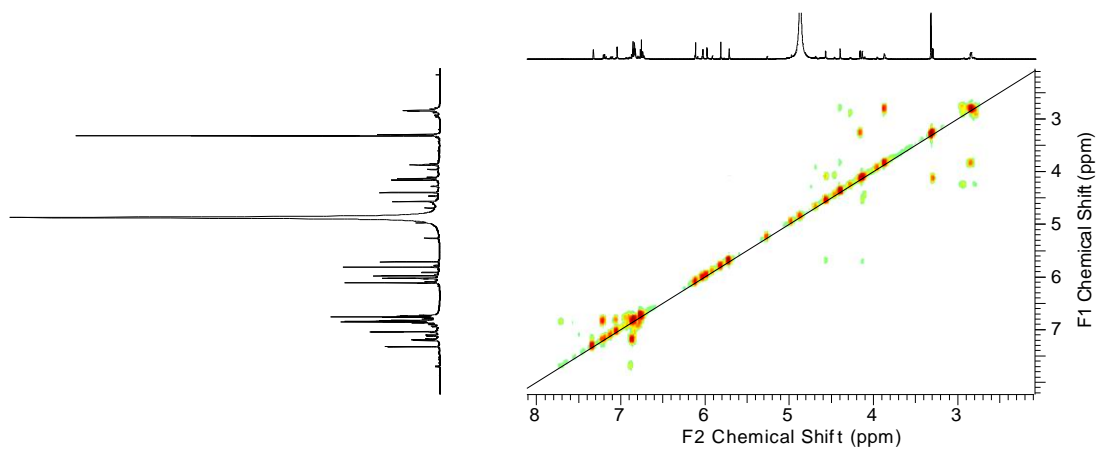

Fig 3S.  $^1\text{H}$  –  $^1\text{H}$  COSY ( $\text{CD}_3\text{OD}$ , 400 MHz) Compound ETP.

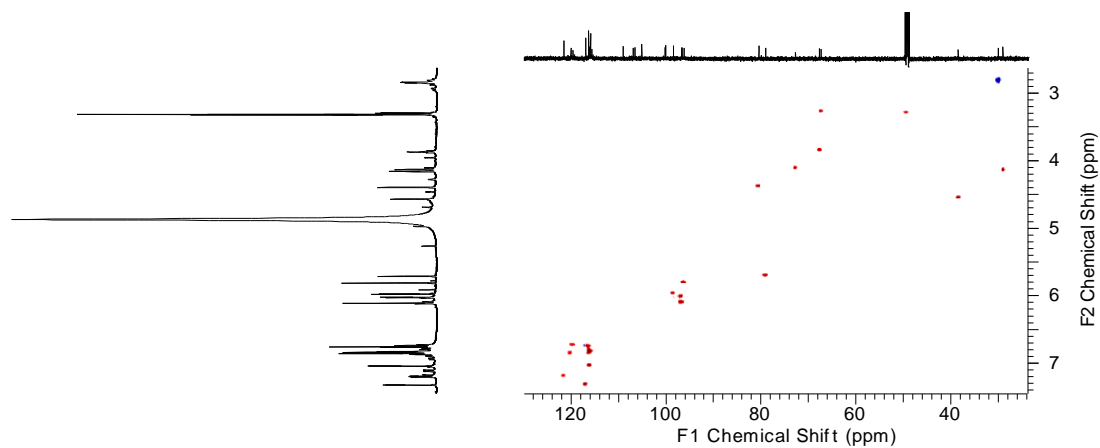

Fig4S. gHSQC (CD<sub>3</sub>OD, 400 MHz) Compound ETP

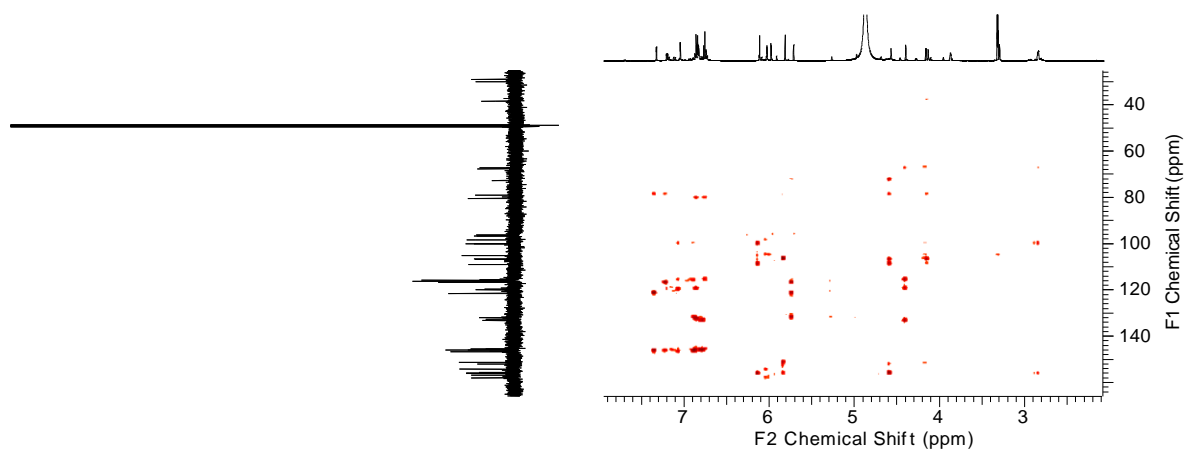

Fig. 5S. HMBC (CD<sub>3</sub>OD, 400 MHz) Compound ETP

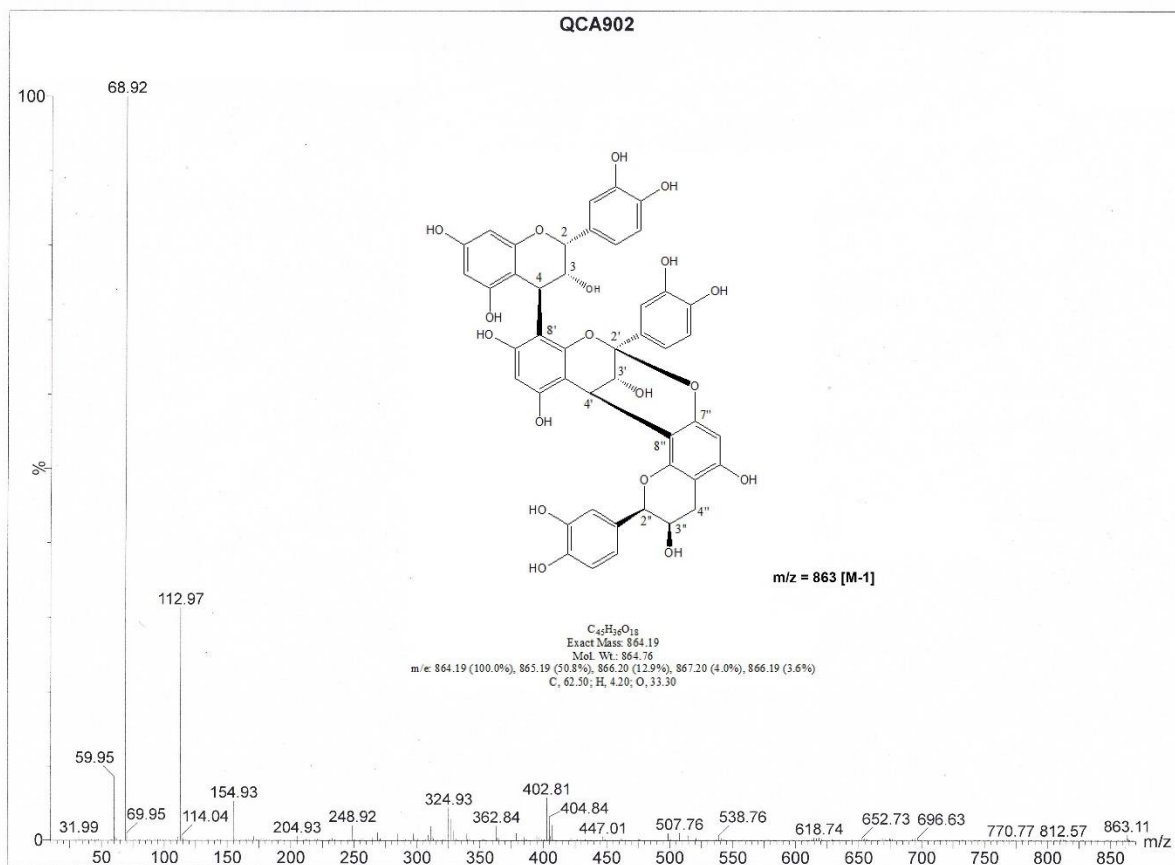

Fig 6S. Mass spectra Compound ETP

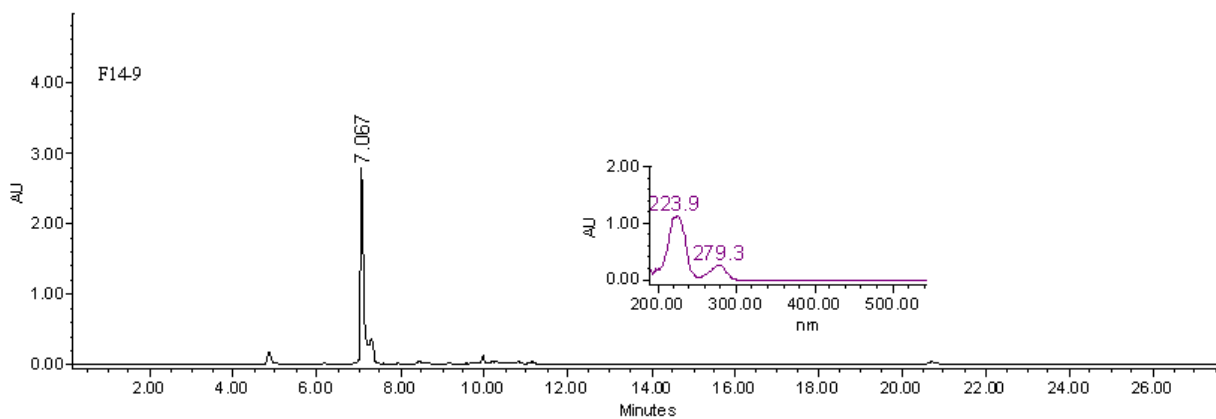

Fig 7S. HPLC Analysis of Fraction F14-9
